# Supplementary material for: Micro–nano NiO-MnCo2O4 heterostructure with optimal interfacial electronic environment for high performance and enhanced lithium storage kinetics
Source: Royal Society of Chemistry journal article supplement (doi:10.1039/d0dt02278k), 2020-01-01
Supplement: d0dt02278k1.pdf [file d0dt02278k1.pdf]

## Electronic Supporting information (ESI)

### **Mico-nano NiO-MnCo<sub>2</sub>O<sub>4</sub> Heterostructure with Optimal Interfacial Electronic Environment for High Performance and Enhanced Lithium Storage Kinetics**

Wei Dang <sup>a</sup>, Xincun Tang <sup>a,\*</sup>, Wei Wang <sup>b</sup>, Yun Yang <sup>c</sup>, Xing Li <sup>a</sup>, Liuchun Huang <sup>a</sup>, Yi Zhang <sup>a,\*</sup>

<sup>a</sup> *College of Chemistry and Chemical Engineering, Central South University, Changsha 410083, P. R. China.*

<sup>b</sup> *Key Laboratory of Hunan Province for Advanced Carbon-based Functional Materials, School of Chemistry and Chemical Engineering, Hunan Institute of Science and Technology, Yueyang, 414006, P. R. China*

<sup>c</sup> *Key Laboratory of Ministry-of-Education for the Synthesis and Application of Organic Functional Molecules, College of Chemistry and Chemical Engineering, Hubei University, Wuhan 430062, P. R. China.*

\* Corresponding author:

Email: [txincun@163.com](mailto:txincun@163.com)

Email: [yzhangcsu@csu.edu.cn](mailto:yzhangcsu@csu.edu.cn)

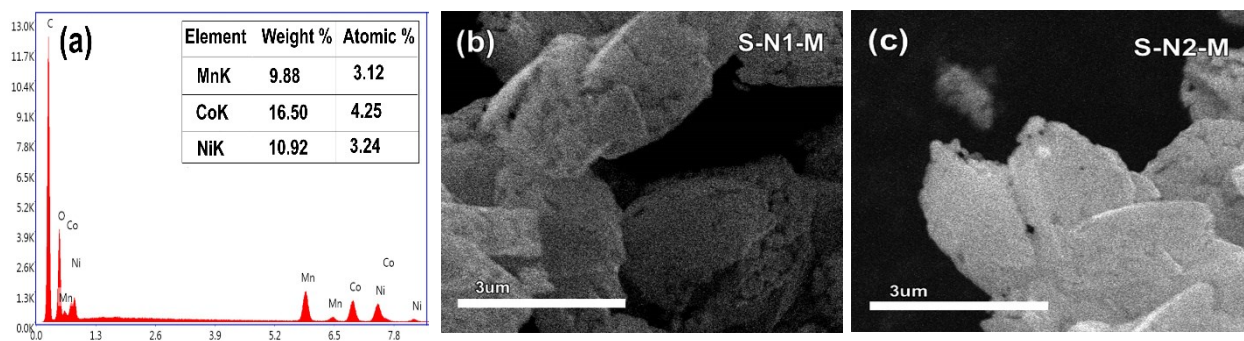

**Figure S1.** (a) EDS mapping of S-N-MC; (b-c) SEM images of S-N1-MC and S-N2-MC.

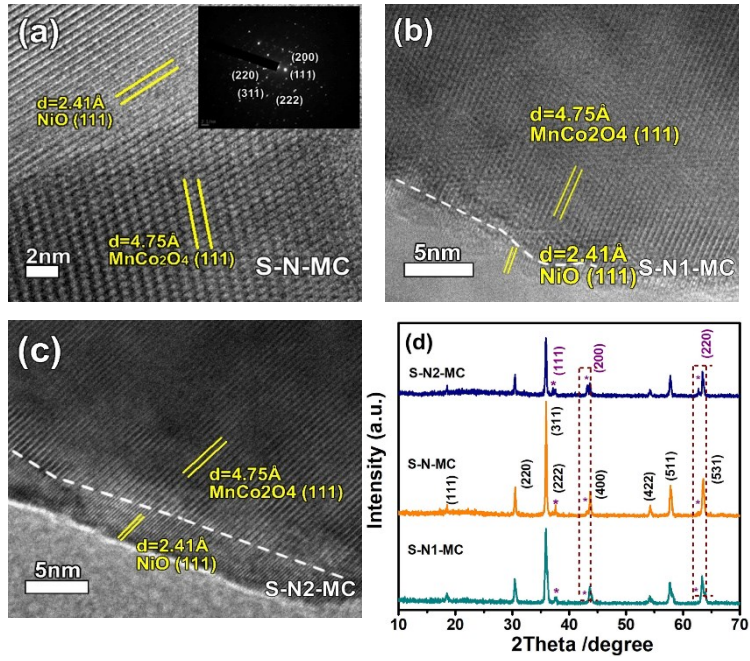

**Figure S2.** HRTEM images of the (a) S-N-MC heterostructure, (b) S-N1-MC, (c) S-N2-MC and (d) the corresponding XRD patterns.

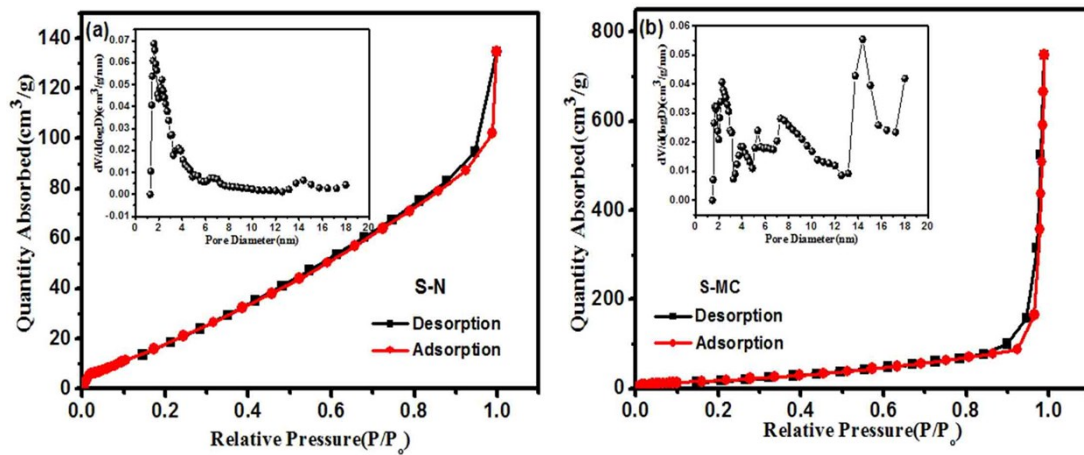

**Figure S3.** N<sub>2</sub> adsorption/desorption isotherms and the corresponding pore size distribution curves of (a) S-N and (b) S-MC.

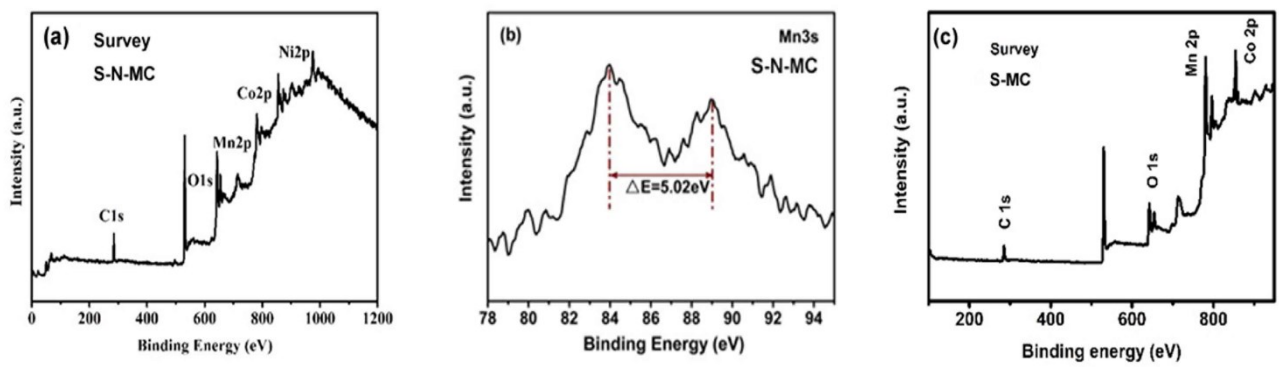

**Figure S4.** XPS survey spectrum of the sample (a) S-N-MC and (c) S-MC; (b) XPS patterns about Mn 3s of S-N-MC.

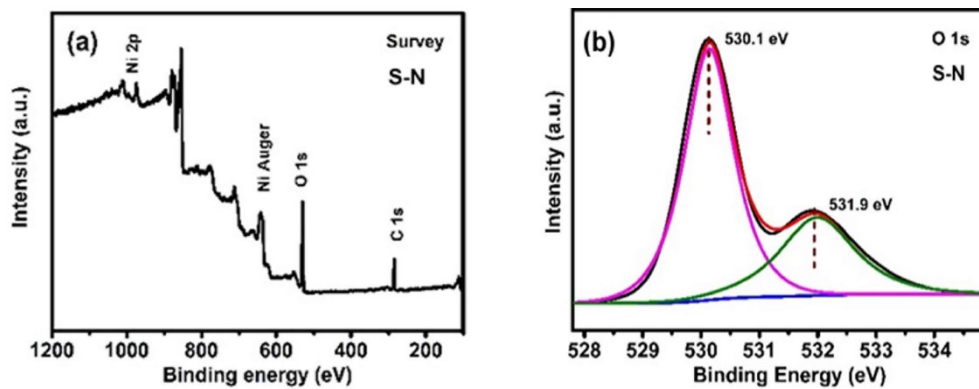

**Figure S5.** XPS results of S-N: (a) full scan spectra, (b) Ni 2p, (c) O 1s.

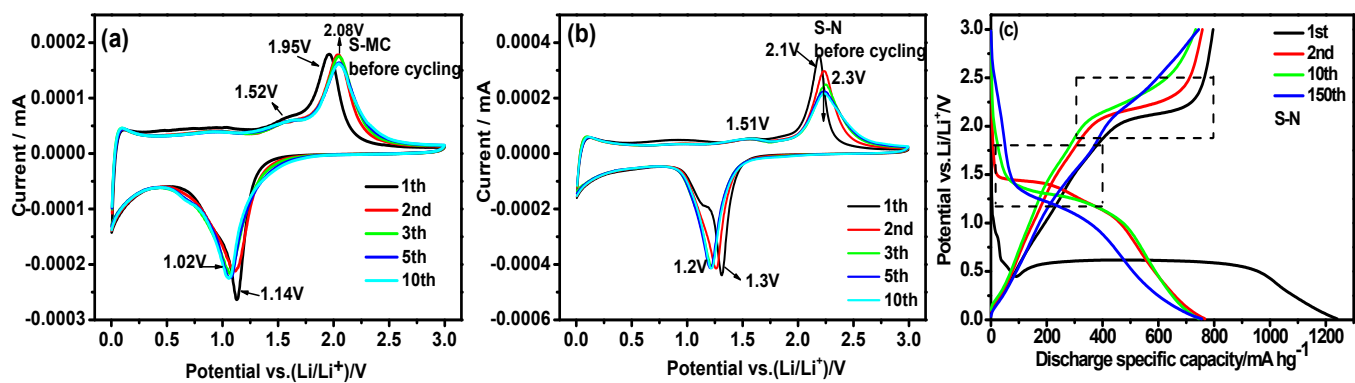

**Figure S6.** (a-b) CV of S-MC and S-N, (c) GDC of S-N at 500 mA h g<sup>-1</sup>.

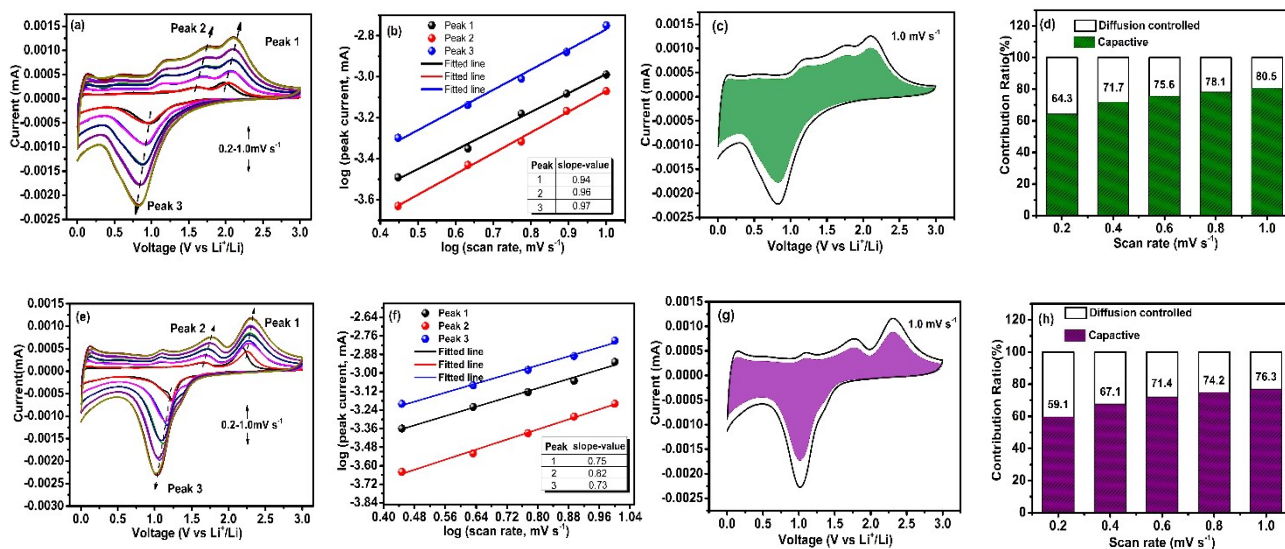

**Figure S7.** (a, e) CV curves at different scan rates from 0.2 to 1.0 mV s<sup>-1</sup>, (b, f) Corresponding log(i) vs. log(v) plots at specific peak currents, (c, g) Shaded area of CV curve with the pseudocapacitive fraction at 1.0 mV s<sup>-1</sup>, and (d, h) bar chart showing the percent of pseudocapacitive contribution at different scan rates of S-MC and (d-f) S-N.



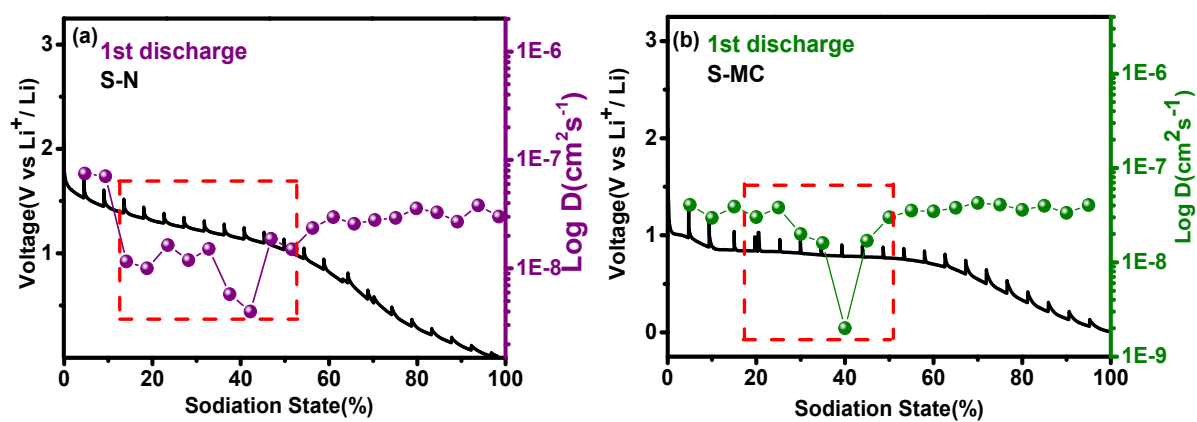

**Figure S8.** GITT curves and the corresponding  $\text{Li}^+$  diffusion coefficient at different discharge/charge state of S-N and S-MC electrodes.

**Table S1.** Diffraction intensities of (220), (311), (511) and (531) crystal planes of S-MC and S-N-MC.

| <b>Selected crystal plane</b>                       | <b>S-MC</b> | <b>S-N-MC</b> |
|-----------------------------------------------------|-------------|---------------|
| <b>Diffraction intensity of (220) crystal plane</b> | 975         | 1141          |
| <b>Diffraction intensity of (311) crystal plane</b> | 2841        | 4316          |
| <b>Diffraction intensity of (511) crystal plane</b> | 775         | 1200          |
| <b>Diffraction intensity of (531) crystal plane</b> | 1083        | 1258          |

**Table S2.** ICP-OES test on the prepared combination electrodes.

| <b>Materials</b> | <b>Ni/ wt%</b> | <b>Mn/ wt%</b> | <b>Co/ wt%</b> |
|------------------|----------------|----------------|----------------|
| <b>S-N-MC</b>    | 26.2           | 21.3           | 38.1           |
| <b>S-N1-MC</b>   | 17.3           | 20.9           | 39.3           |
| <b>S-N2-MC</b>   | 44.7           | 29.6           | 53.2           |

**Table S3.** The crystal analysis results of S-N-MC and S-MC by Rietveld refinements.

| <b>Sample</b> | <b>a, b, c / Å</b> | <b><math>\alpha, \beta, \gamma / ^\circ</math></b> | <b>V / Å<sup>3</sup></b> | <b>R<sub>wp</sub> / %</b> |
|---------------|--------------------|----------------------------------------------------|--------------------------|---------------------------|
| <b>S-N-MC</b> | 8.24300            | 90.000                                             | 568.548                  | 2.82                      |
| <b>S-MC</b>   | 8.213728           | 90.000                                             | 554.142                  | 3.85                      |

**Table S4.** BET specific surface areas and pore size distributions of the samples.

| <b>Materials</b> | <b>BET surface<br/>area/ (m<sup>2</sup> g<sup>-1</sup>)</b> | <b>Pore<br/>volume<br/>/ (nm)</b> |
|------------------|-------------------------------------------------------------|-----------------------------------|
| <b>S-N</b>       | 62.3                                                        | 6                                 |
| <b>S-MC</b>      | 63.5                                                        | 33                                |
| <b>S-N-MC</b>    | 29.4                                                        | 16                                |

**Table S5.** Impedance fitted parameters for the electrode samples before and after cycling

| <b>Sample</b>                    | <b>S-N</b> | <b>S-MC</b> | <b>S-N-MC</b> | <b>S-N1-MC</b> | <b>S-N2-MC</b> |
|----------------------------------|------------|-------------|---------------|----------------|----------------|
| <b>Rct(ohm)<br/>bef. cycling</b> | 134.2      | 127.9       | 50.3          | 68.5           | 85.5           |
| <b>Rct(ohm)<br/>aft. cycling</b> | 332.8      | 233.2       | 82.1          | 125.1          | 168.7          |

**Table S6.** Reversible specific capacities of MnCo<sub>2</sub>O<sub>4</sub>-based sample reported before and in this work.

| <b>Morphology</b>                                                       | <b>Method</b>               | <b>Current density (mA g<sup>-1</sup>)</b> | <b>Cycle number</b>       | <b>Remaining Density (mA h g<sup>-1</sup>)</b> | <b>Ref.</b>      |
|-------------------------------------------------------------------------|-----------------------------|--------------------------------------------|---------------------------|------------------------------------------------|------------------|
| Ni substituted MnCo <sub>2</sub> O <sub>4</sub> nanowires               | hydrothermal method         | 500                                        | 200                       | 706                                            | [13]             |
| NiO-MnCo <sub>2</sub> O <sub>4</sub> microspheres                       | ultrasonic nebulizer        | 800                                        | 300                       | 687                                            | [28]             |
| multiporous MnCo <sub>2</sub> O <sub>4</sub>                            | solvothermal method         | 400                                        | 100                       | 610                                            | [35]             |
| <b>Core-Shell Ellipsoidal MnCo<sub>2</sub>O<sub>4</sub></b>             | hydrothermal method         | 400                                        | 70                        | 750                                            | [37]             |
| MnCo <sub>2</sub> O <sub>4</sub> microspheres                           | calcination-free synthesis  | 900                                        | 200                       | 320                                            | [38]             |
| double-shelled hollow graphene-MnCo <sub>2</sub> O <sub>4</sub> spheres | solvothermal method         | 200                                        | 100                       | 703                                            | [41]             |
| Sheet or plate type morphology MnCo <sub>2</sub> O <sub>4</sub>         | molten salt method          | 600                                        | 70                        | 380                                            | [45]             |
| <b>NiO-MnCo<sub>2</sub>O<sub>4</sub> microspheres</b>                   | <b><u>self-assembly</u></b> | <b>500</b><br><b>2000</b>                  | <b>500</b><br><b>1000</b> | <b>1330</b><br><b>719</b>                      | <b>This work</b> |
